# Supplementary material for: Dinuclear oxidovanadium complexes with dihydrazone ligands derived from diethyl 2,6-dimethylpyridine-3,5-dicarboxylate obtained from Hantzsch reaction; crystal structure and catalytic activity
Source: Royal Society of Chemistry journal article supplement (doi:10.1039/d2nj06279h), 2023-01-01
Supplement: d2nj06279h1.pdf [file d2nj06279h1.pdf]

## Dincular oxidovanadium complexes with dihydrazone ligands derived from diethyl 2,6-dimethylpyridine-3,5-dicarboxylate obtained from Hantzsch reaction; crystal structure and catalytic activity

Fatemeh Soltani,<sup>a</sup> Rahman Bikas,<sup>a,\*</sup> Neda Heydari,<sup>b</sup> Anna Kozakiewicz-Piekarz<sup>c</sup>

<sup>a</sup> Department of Chemistry, Faculty of Science, Imam Khomeini International University, 34148-96818, Qazvin, Iran

<sup>b</sup> Department of Chemistry, Faculty of Science, University of Zanjan, 45371-38791, Zanjan, Iran

<sup>c</sup> Department of Biomedical and Polymer Chemistry, Faculty of Chemistry, Nicolaus Copernicus University in Torun, 87-100, Torun, Poland

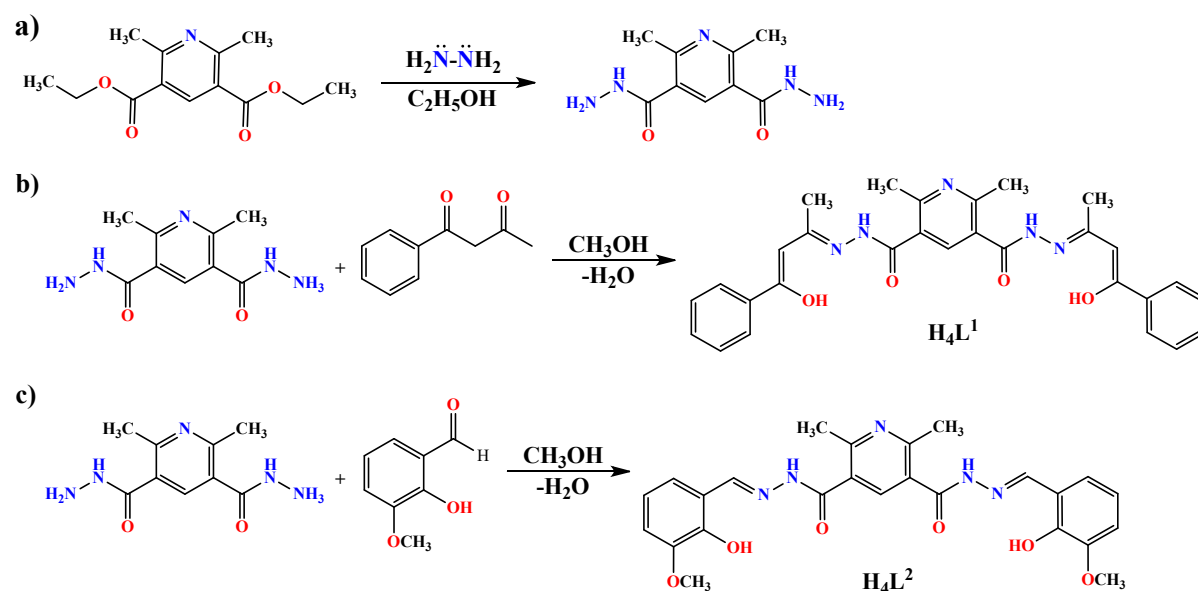

Scheme S1. Synthesis pathway of a) dihydrazone compound, b)  $H_4L^1$  and c)  $H_4L^2$

**Table S1.** Hydrogen bonding interactions for **1** and **2** (Å, °)

| D–H···A                        | D–H  | H···A | D···A     | D–H···A |
|--------------------------------|------|-------|-----------|---------|
| <b>Complex 1</b>               |      |       |           |         |
| C15–H15C···N11 <sup>ii</sup>   | 0.98 | 2.62  | 3.488(6)  | 148     |
| O24A–H24A···O21 <sup>iii</sup> | 0.84 | 2.02  | 2.840(14) | 167     |
| O24A–H24A···N25 <sup>iii</sup> | 0.84 | 2.49  | 2.964(12) | 117     |
| N25–H25A···O21 <sup>iv</sup>   | 0.87 | 2.29  | 3.088(6)  | 152     |
| N25–H25A···O22 <sup>iv</sup>   | 0.87 | 2.36  | 3.080(5)  | 141     |
| N25–H25B···O1W                 | 0.89 | 2.06  | 2.948(7)  | 175     |
| N25–H25C···O21                 | 0.88 | 1.91  | 2.781(5)  | 173     |
| N25–H25D···O22 <sup>v</sup>    | 0.87 | 1.98  | 2.833(5)  | 166     |
| N25–H25D···O24B <sup>v</sup>   | 0.87 | 2.36  | 2.824(15) | 114     |
| O1W–H1WA···N19 <sup>vi</sup>   | 0.94 | 1.78  | 2.720(15) | 180     |
| <b>Complex 2</b>               |      |       |           |         |
| C6A–H6A···O21A <sup>i</sup>    | 0.98 | 2.65  | 3.133(6)  | 110     |
| C6A–H6C···O22B <sup>ii</sup>   | 0.98 | 2.61  | 3.573(6)  | 168     |
| C6B–H6F···O21B <sup>iii</sup>  | 0.98 | 2.65  | 3.288(6)  | 123     |
| O1W–H1WA···O14B <sup>iv</sup>  | 0.86 | 2.28  | 3.091(5)  | 158     |
| O1W–H1WB···N18A                | 0.86 | 2.02  | 2.841(5)  | 161     |
| N24–H24A···O21A                | 0.99 | 1.86  | 2.827(5)  | 163     |
| N24–H24B···O1W <sup>v</sup>    | 0.99 | 1.95  | 2.909(5)  | 161     |
| N24–H24C···O22A <sup>vi</sup>  | 0.99 | 1.83  | 2.829(5)  | 175     |
| N24–H24D···O5B <sup>i</sup>    | 0.99 | 2.34  | 2.966(5)  | 120     |
| N24–H24D···O8B <sup>i</sup>    | 0.99 | 1.99  | 2.967(5)  | 166     |
| N23–H23A···O22B <sup>vii</sup> | 0.99 | 1.88  | 2.867(5)  | 166     |
| N23–H23B···O1W <sup>iv</sup>   | 0.99 | 2.16  | 3.100(5)  | 156     |
| N23–H23C···O22A <sup>iii</sup> | 0.99 | 2.34  | 2.990(5)  | 122     |
| N23–H23C···O21B                | 0.99 | 2.04  | 2.765(5)  | 128     |
| N23–H23D···O5A <sup>iii</sup>  | 0.99 | 2.08  | 2.890(5)  | 137     |
| N23–H23D···O8A <sup>iii</sup>  | 0.99 | 2.07  | 2.931(5)  | 144     |

Symmetry codes: for **1** (ii)  $x, -y+1, z-1/2$ ; (iii)  $x, y, z-1$ ; (iv)  $x, -y+2, z+1/2$ ; (v)  $x, y, z+1$ ; (vi)  $-x+1, -y+1, -z+2$ ; for **2** (i)  $-x+1, y-1/2, -z+3/2$ ; (ii)  $x, y-1, z$ ; (iii)  $-x+2, y+1/2, -z+3/2$ ; (iv)  $-x+2, -y+1, -z+1$ ; (v)  $-x+1, -y+1, -z+1$ ; (vi)  $x-1, y, z$ ; (vii)  $x+1, y, z$ .

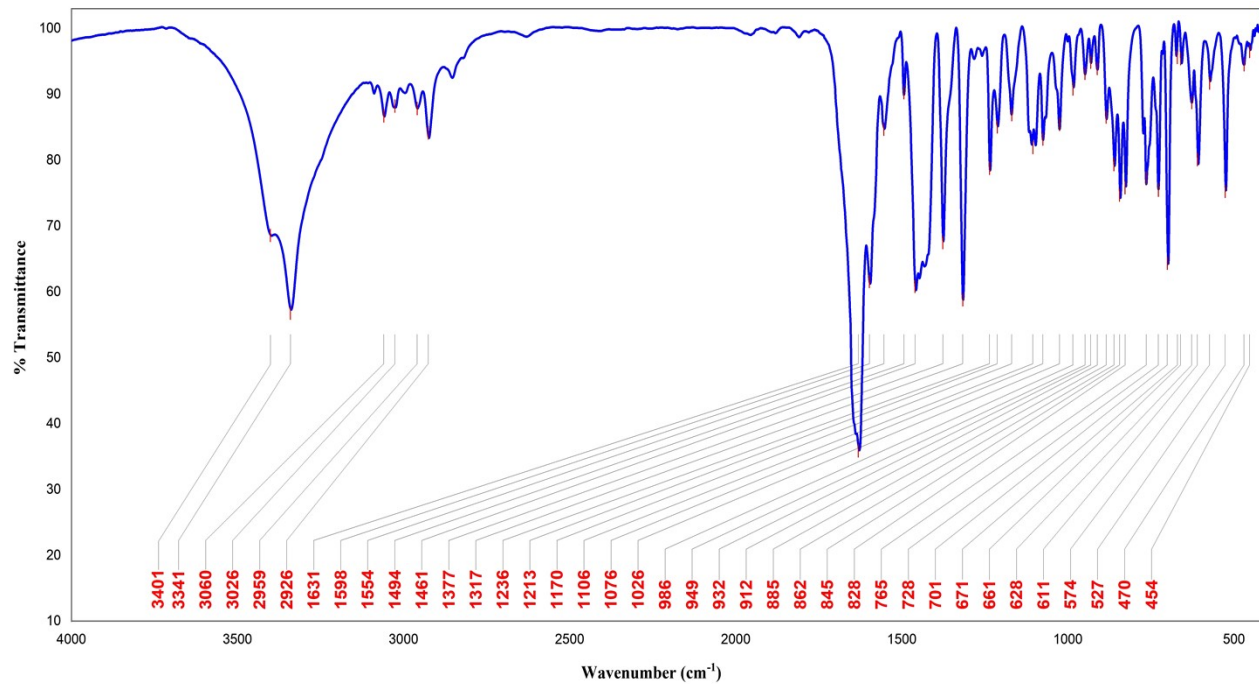

**Fig. S1.** FT-IR spectrum of H<sub>4</sub>L<sup>1</sup>

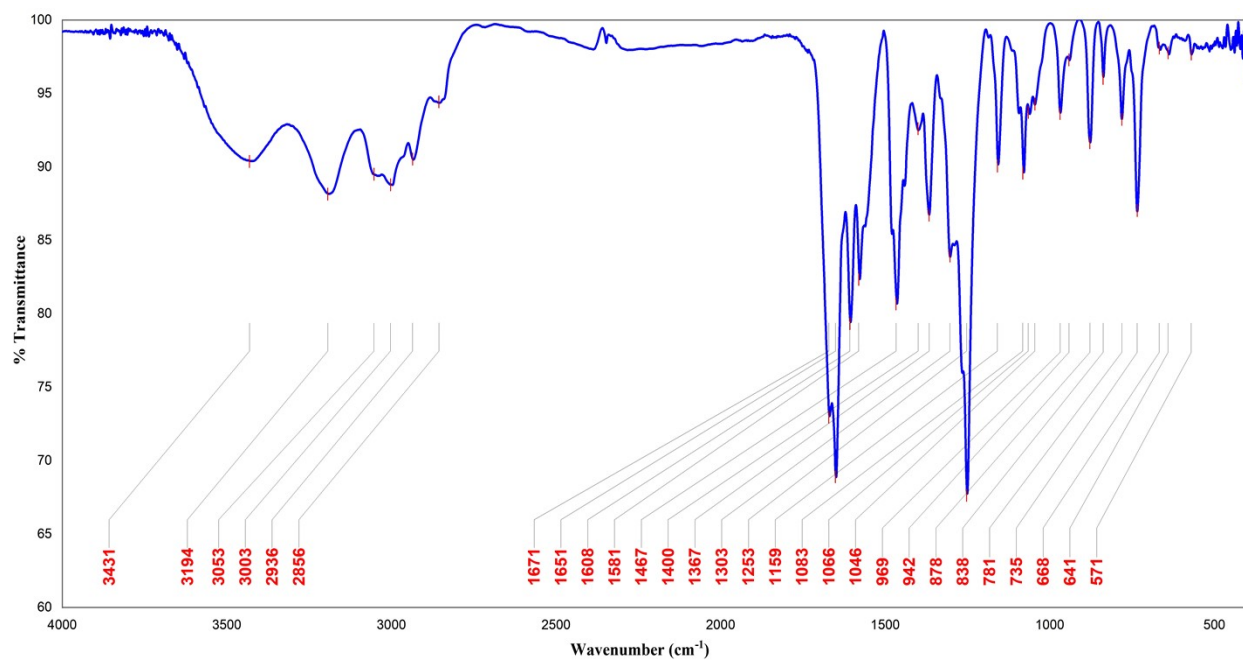

**Fig. S2.** FT-IR spectrum of H<sub>4</sub>L<sup>2</sup>

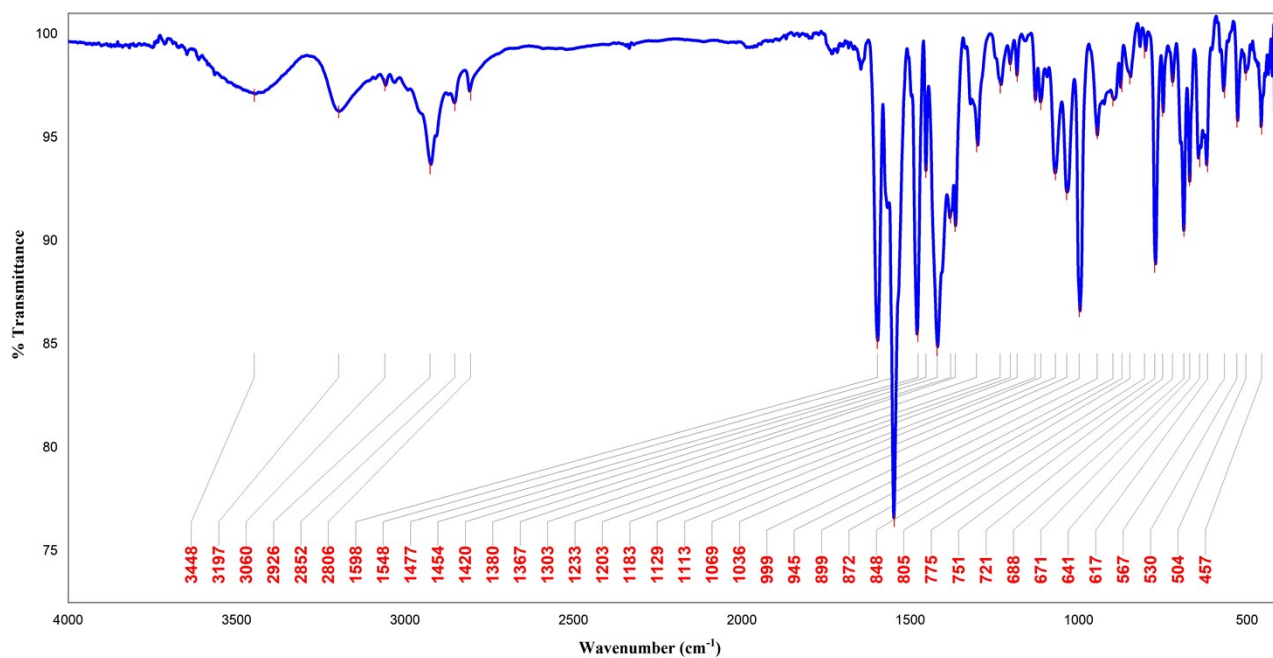

**Fig. S3.** FT-IR spectrum of compound 1

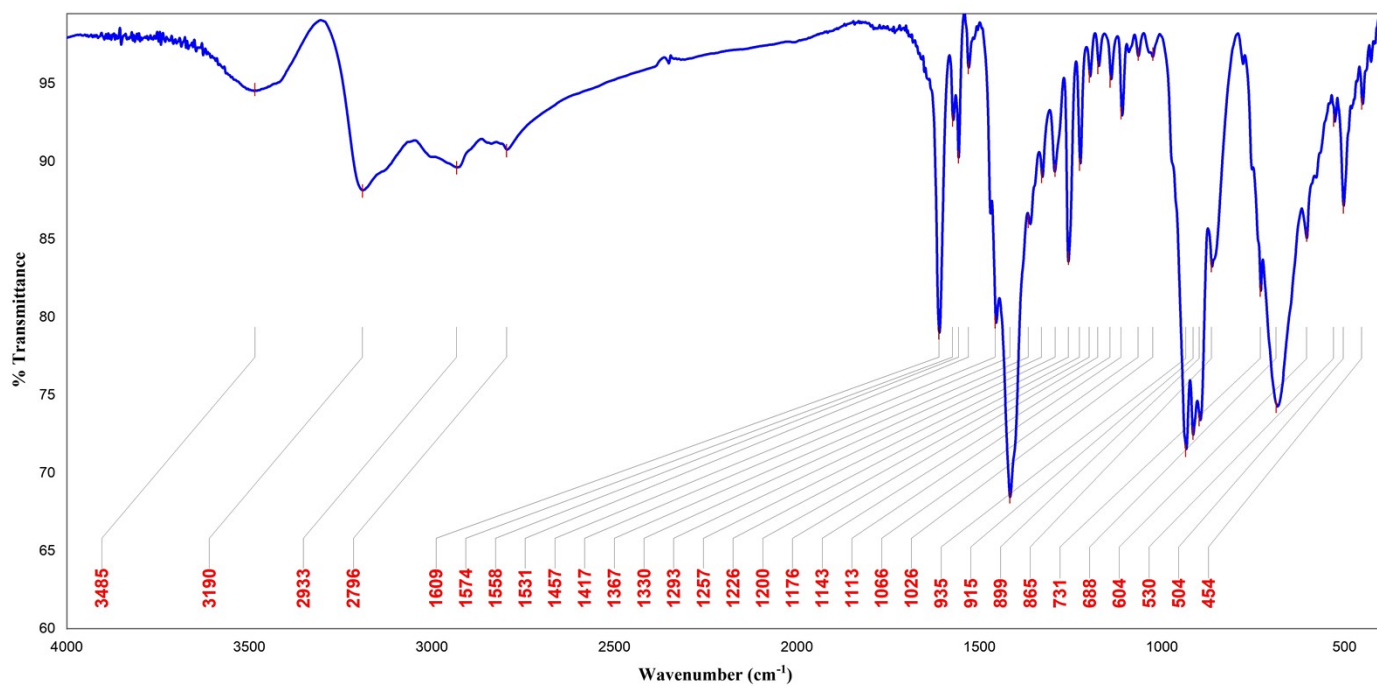

**Fig. S4.** FT-IR spectrum of compound 2

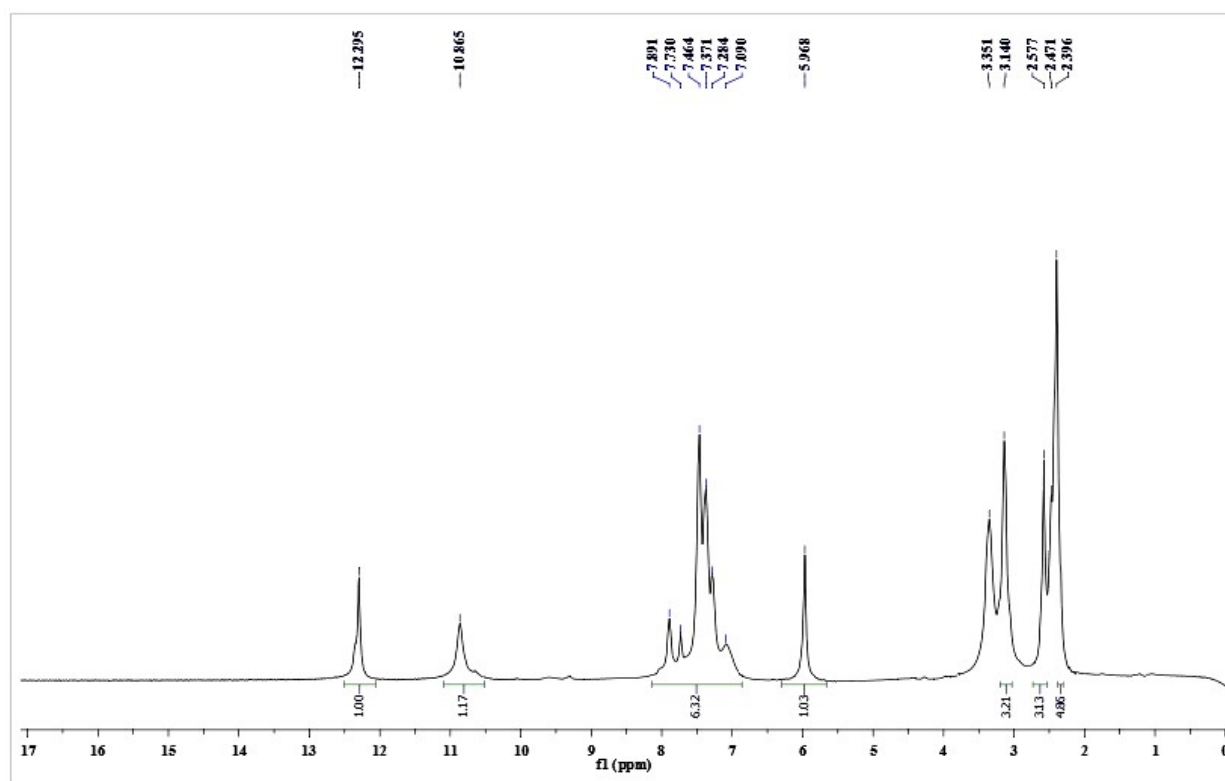

**Fig. S5.**  $^1\text{H}$  NMR spectrum of  $\text{H}_4\text{L}^1$  in  $\text{DMSO-d}_6$

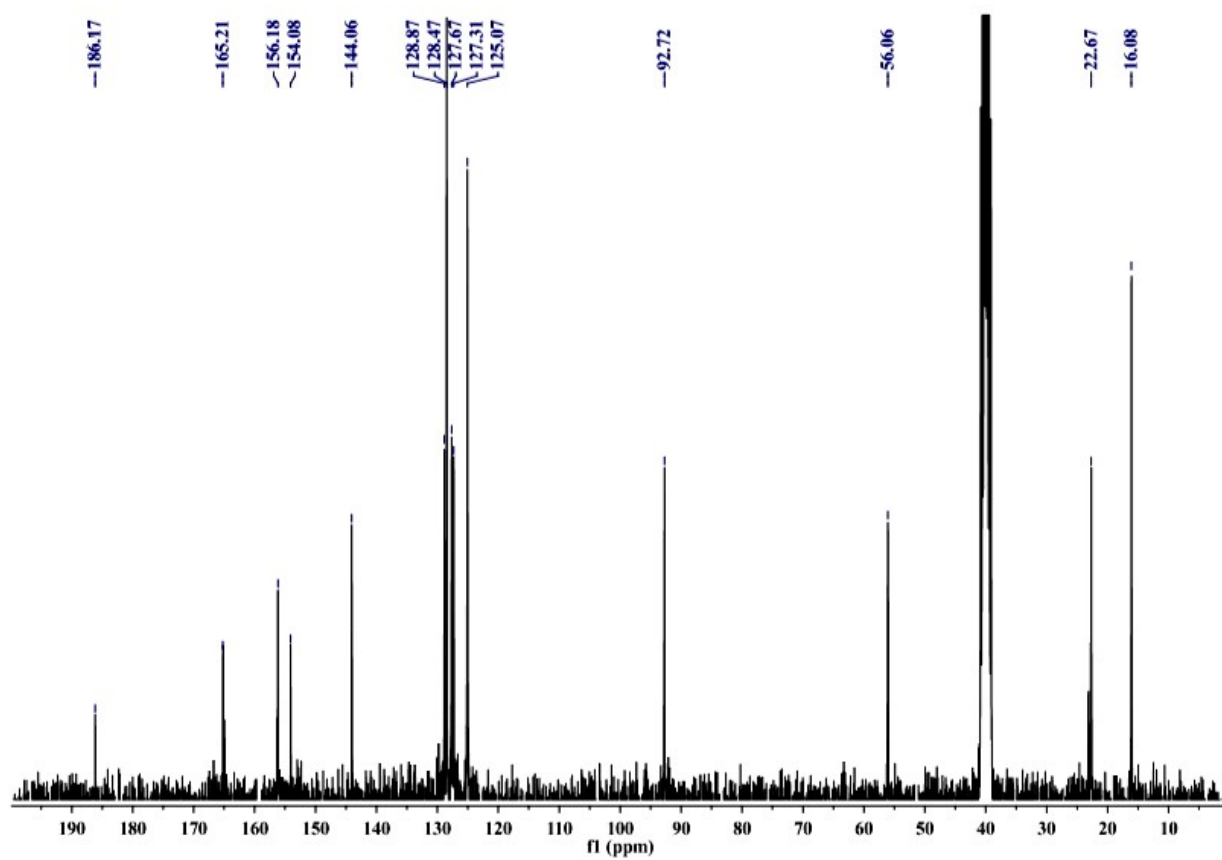

**Fig. S6.**  $^{13}\text{C}$  NMR spectrum of  $\text{H}_4\text{L}^1$  in  $\text{DMSO-d}_6$

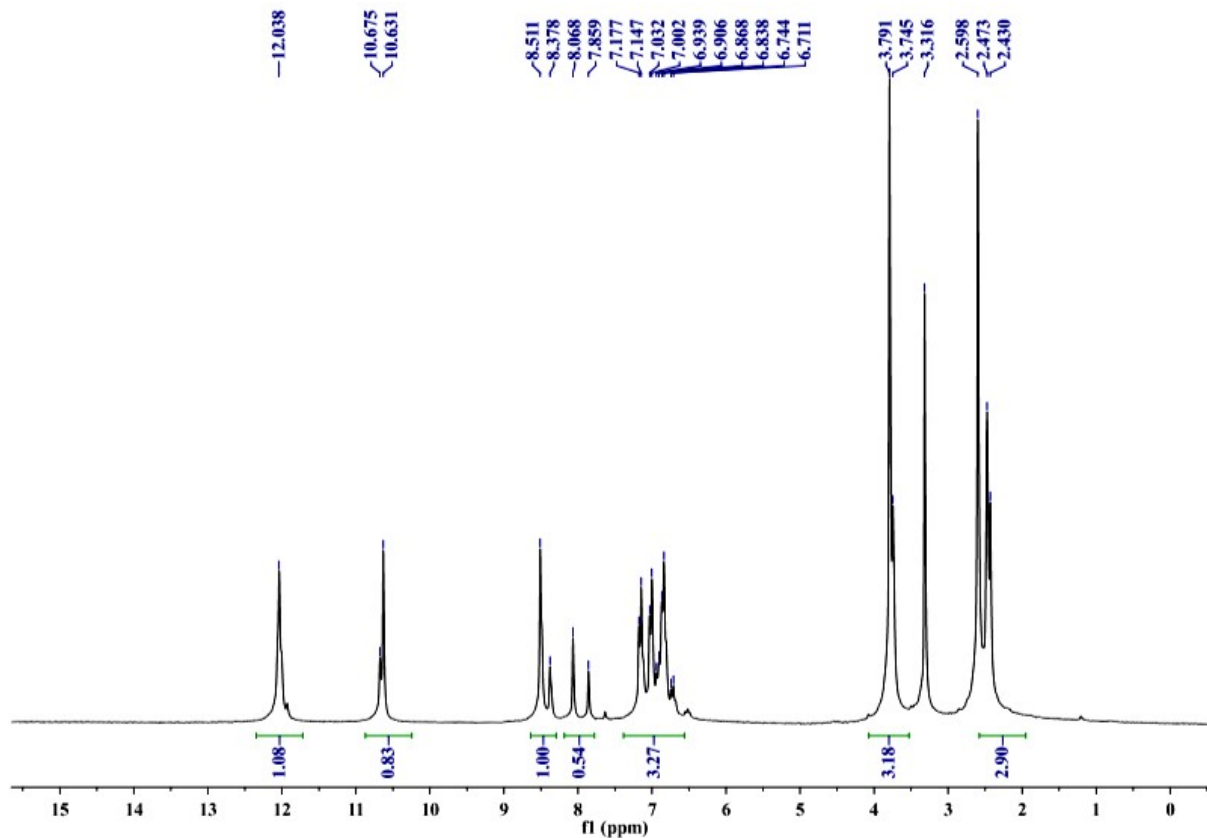

Fig. S7.  $^1\text{H}$  NMR spectrum of  $\text{H}_4\text{L}^2$  in  $\text{DMSO-d}_6$

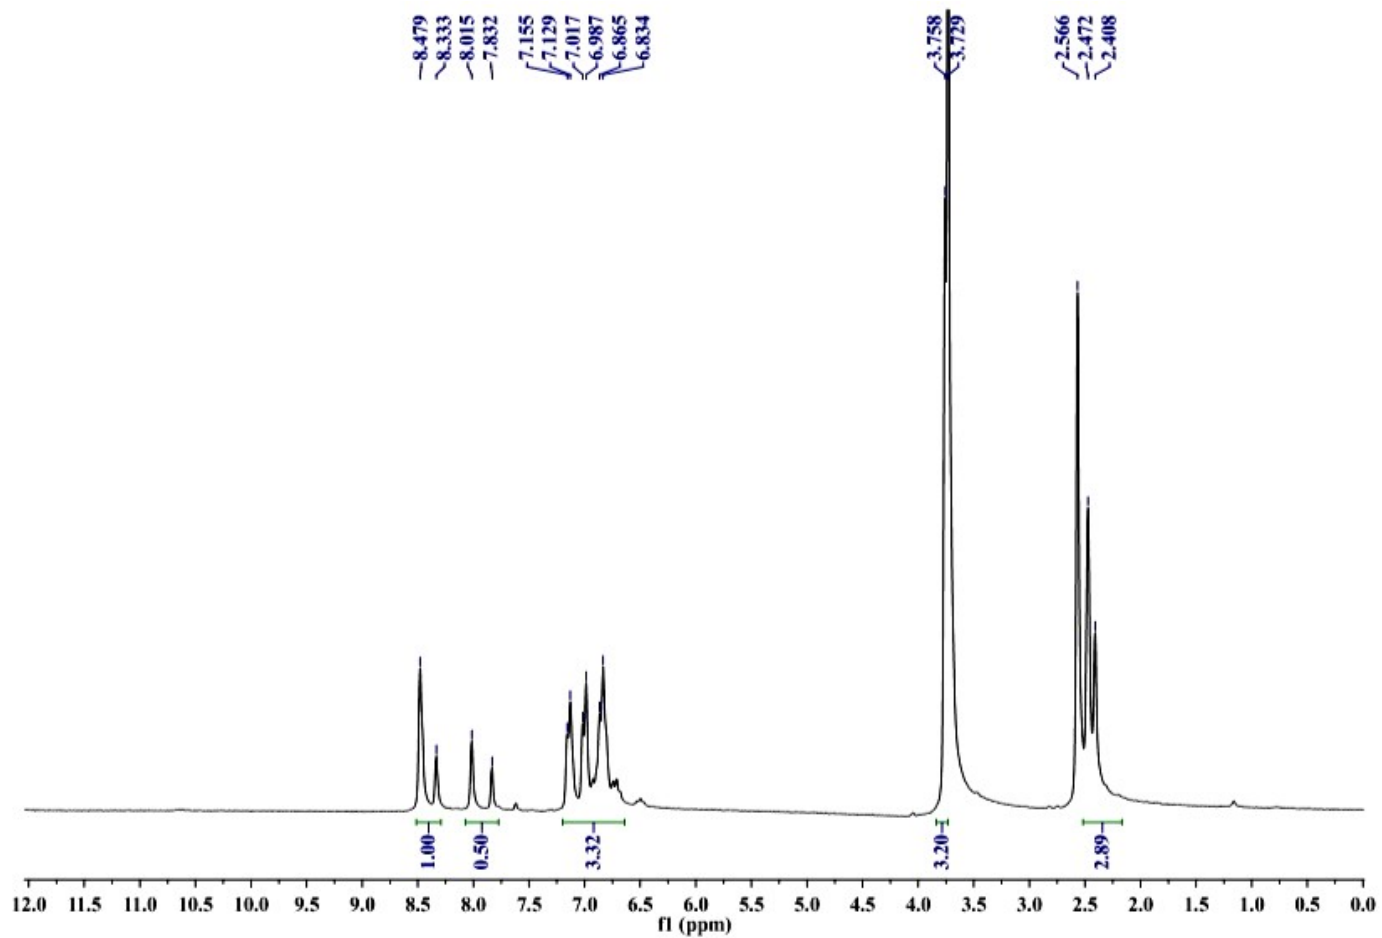

**Fig. S8.**  $^1\text{H}$  NMR spectrum of  $\text{H}_4\text{L}^2$  in  $\text{DMSO-d}_6 + \text{D}_2\text{O}$



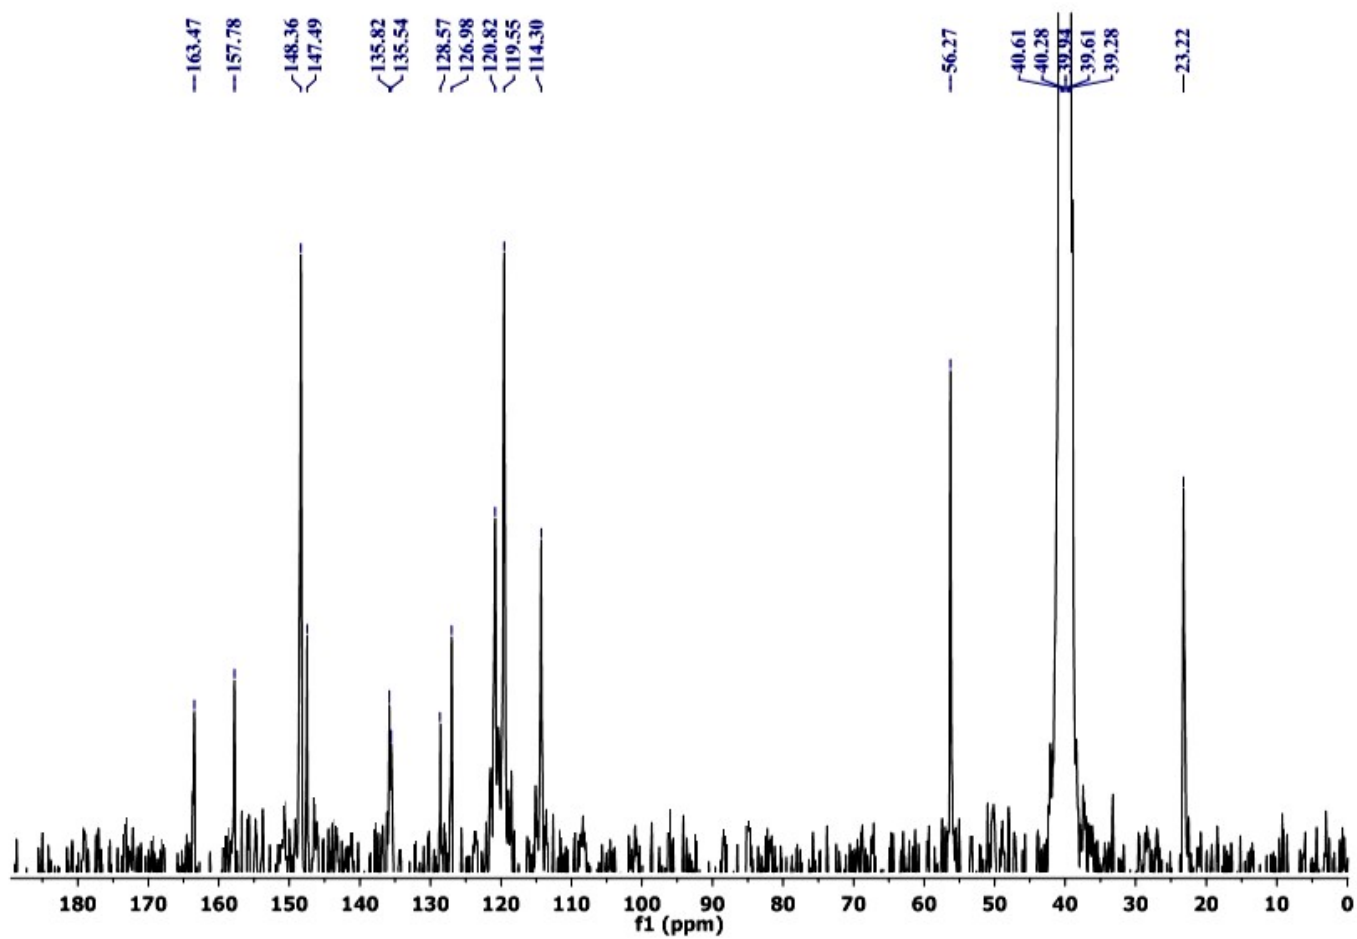

**Fig. S9.**  $^{13}\text{C}$  NMR spectrum of  $\text{H}_4\text{L}^2$  in  $\text{DMSO-d}_6$

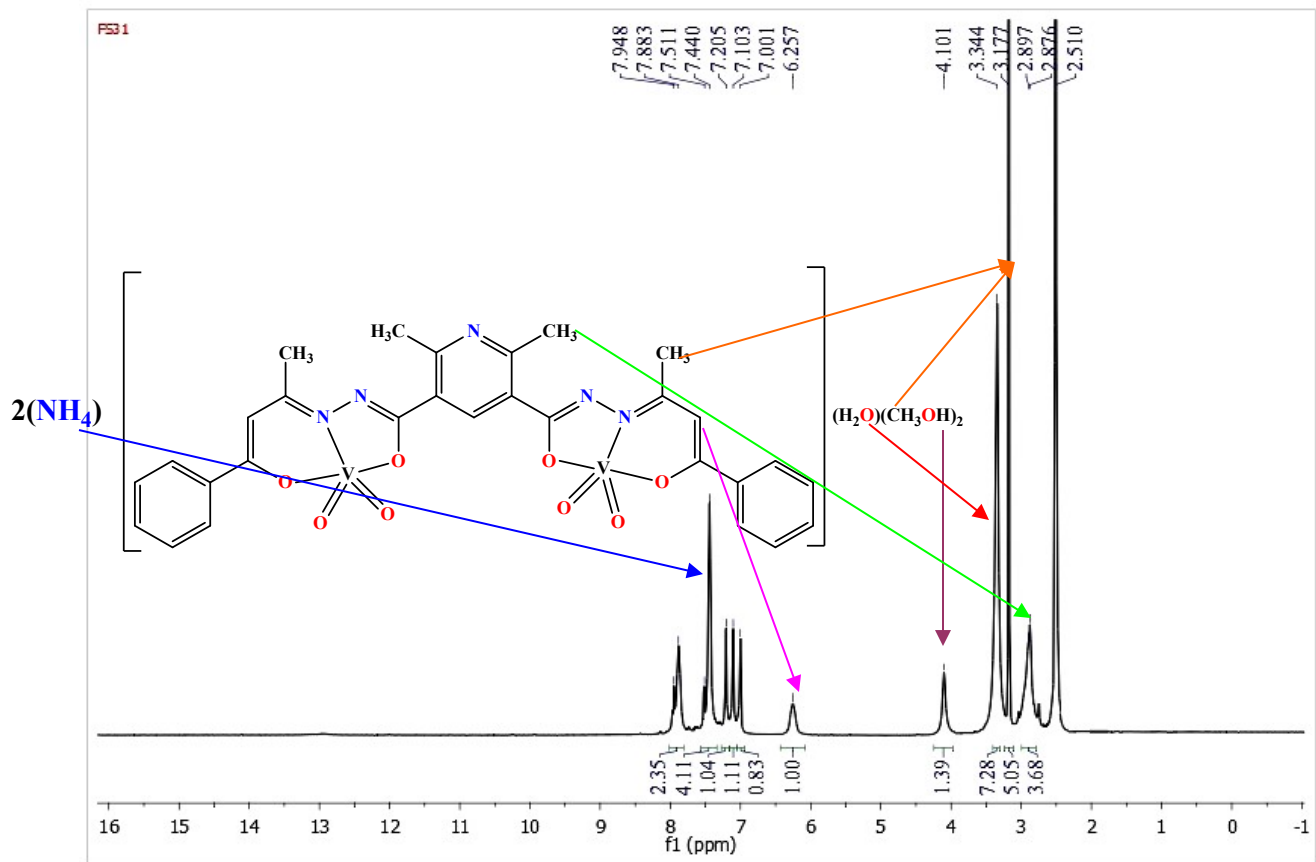

**Fig. S10.** <sup>1</sup>H NMR spectrum of complex **1** in DMSO-d<sub>6</sub>

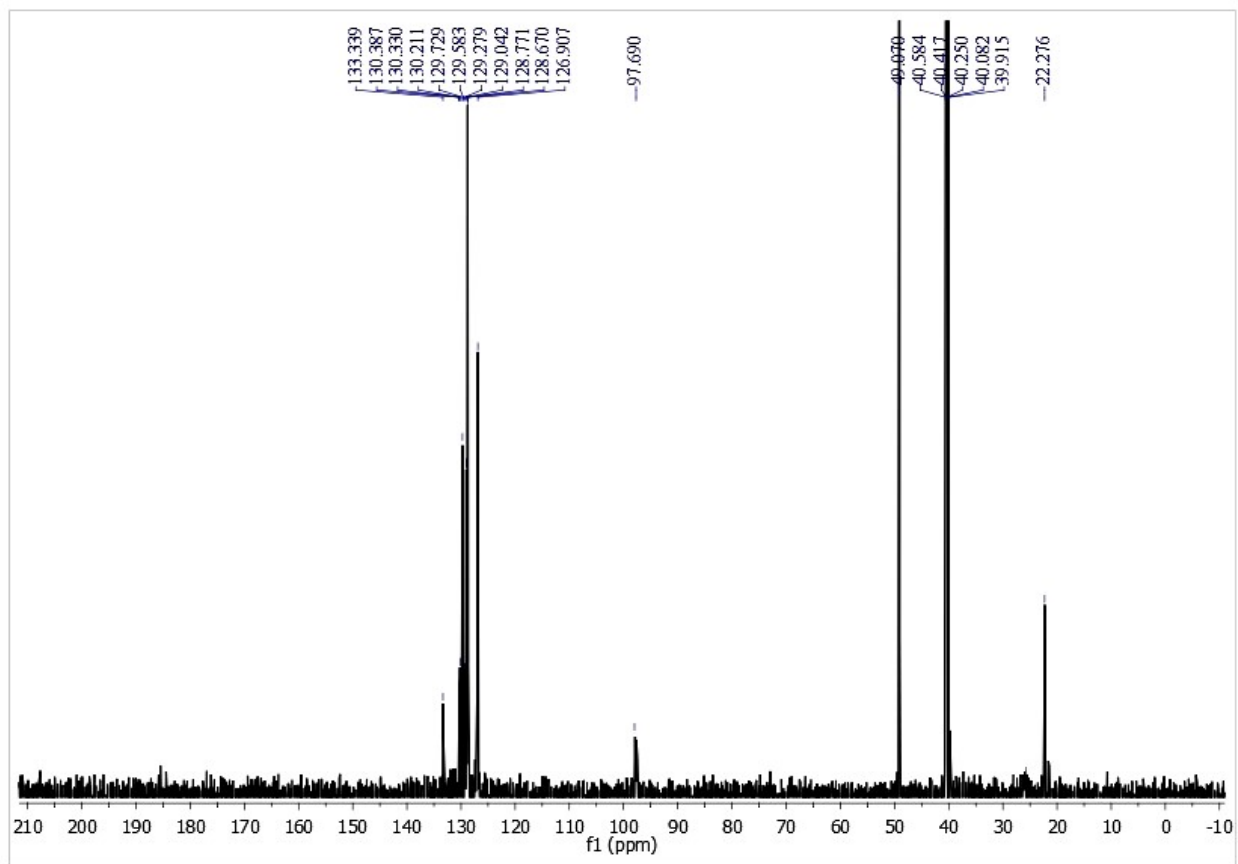

**Fig. S11.**  $^{13}\text{C}$  NMR spectrum of complex **1** in  $\text{DMSO-d}_6$

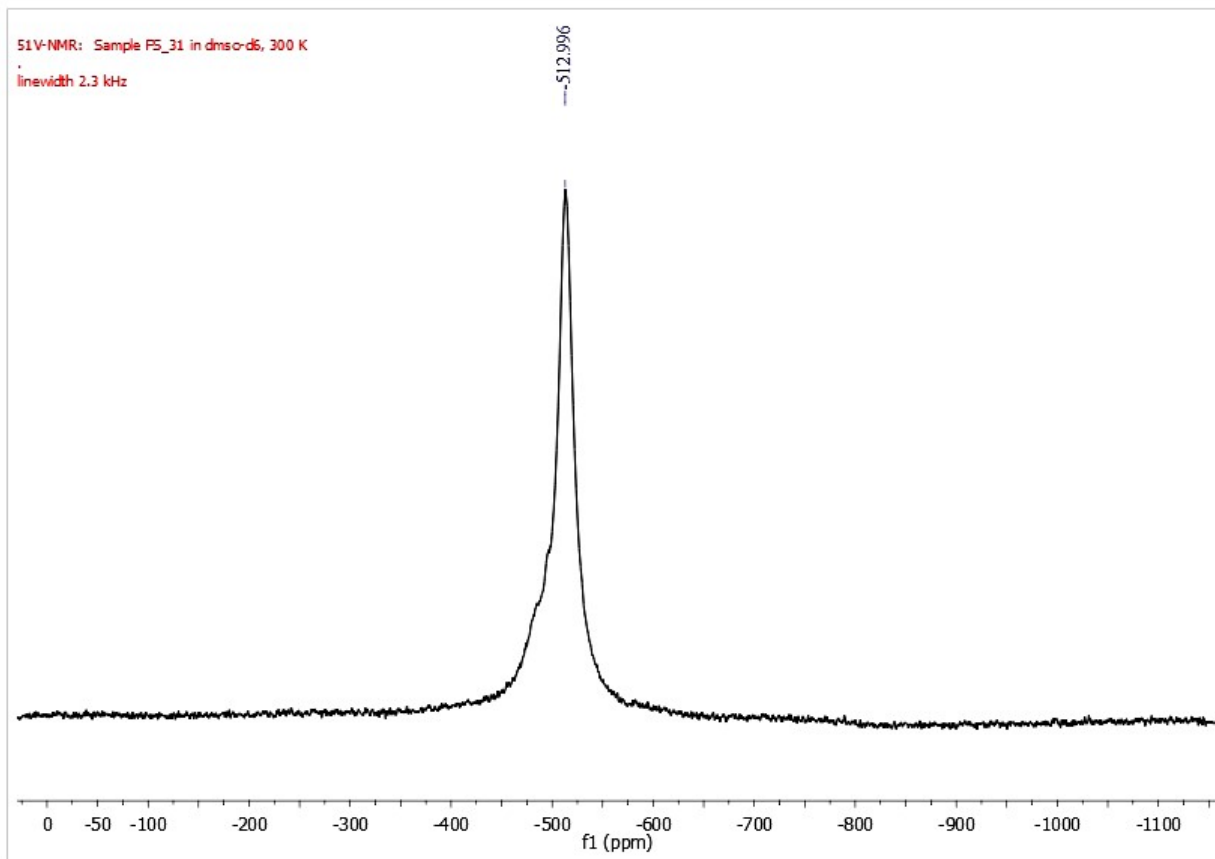

**Fig. S12.**  $^{51}\text{V}$  NMR spectrum of complex **1** in DMSO- $\text{d}_6$

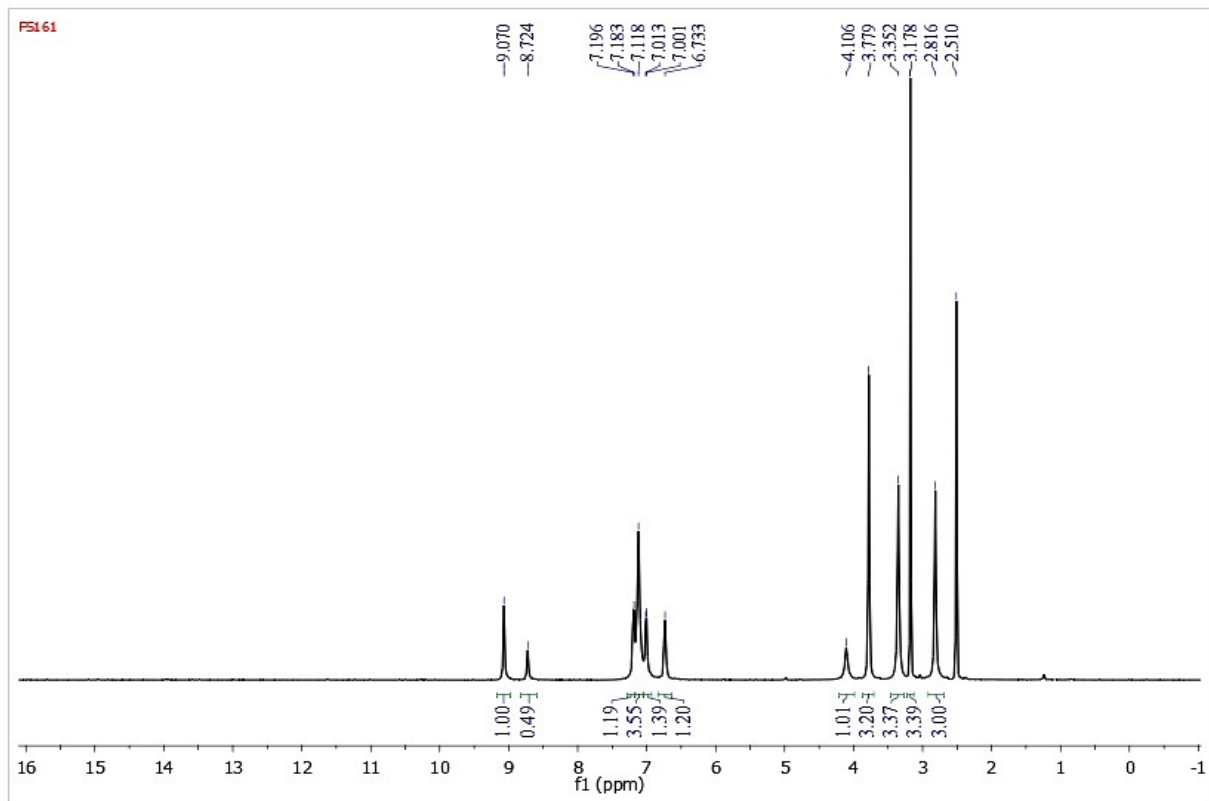

Fig. S13.  $^1\text{H}$  NMR spectrum of complex **2** in  $\text{DMSO-d}_6$  (300 MHz)

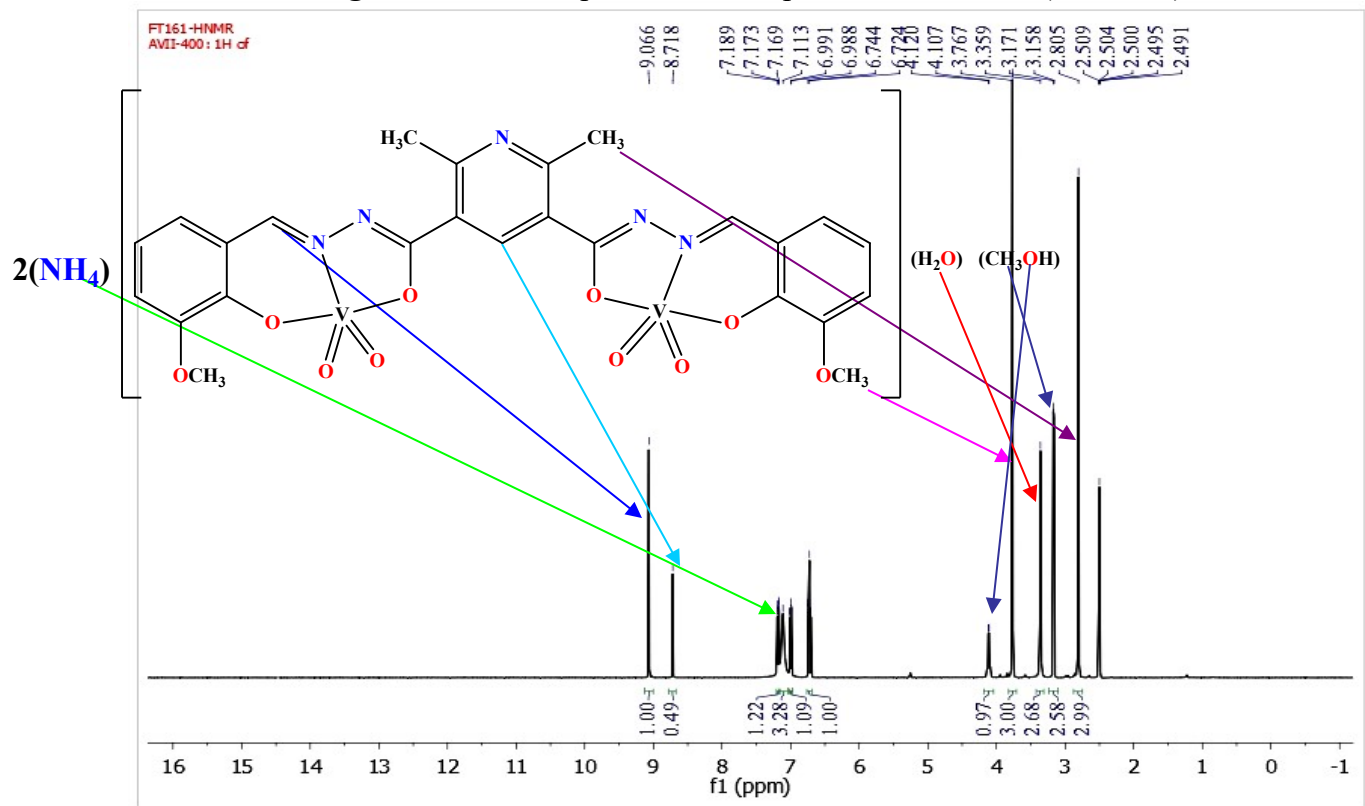

Fig. S14.  $^1\text{H}$  NMR spectrum of complex **2** in  $\text{DMSO-d}_6$  (400 MHz)

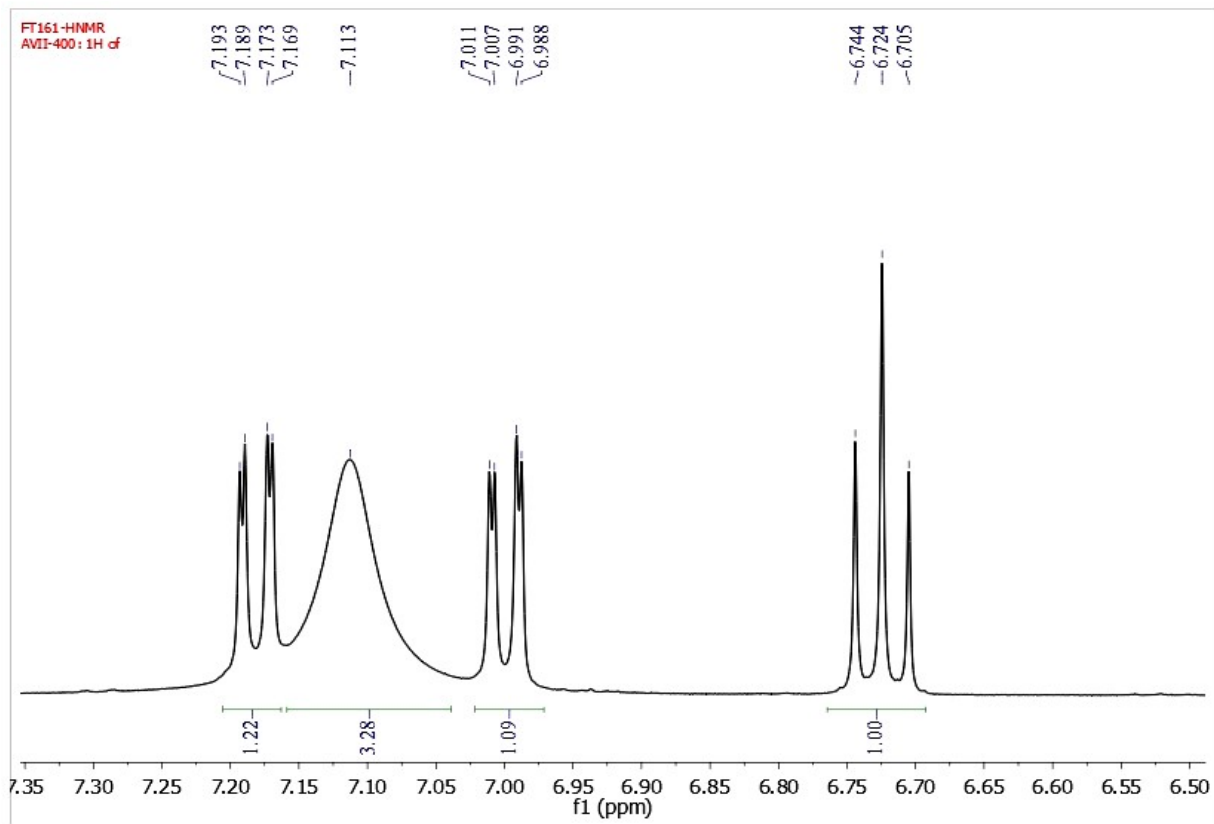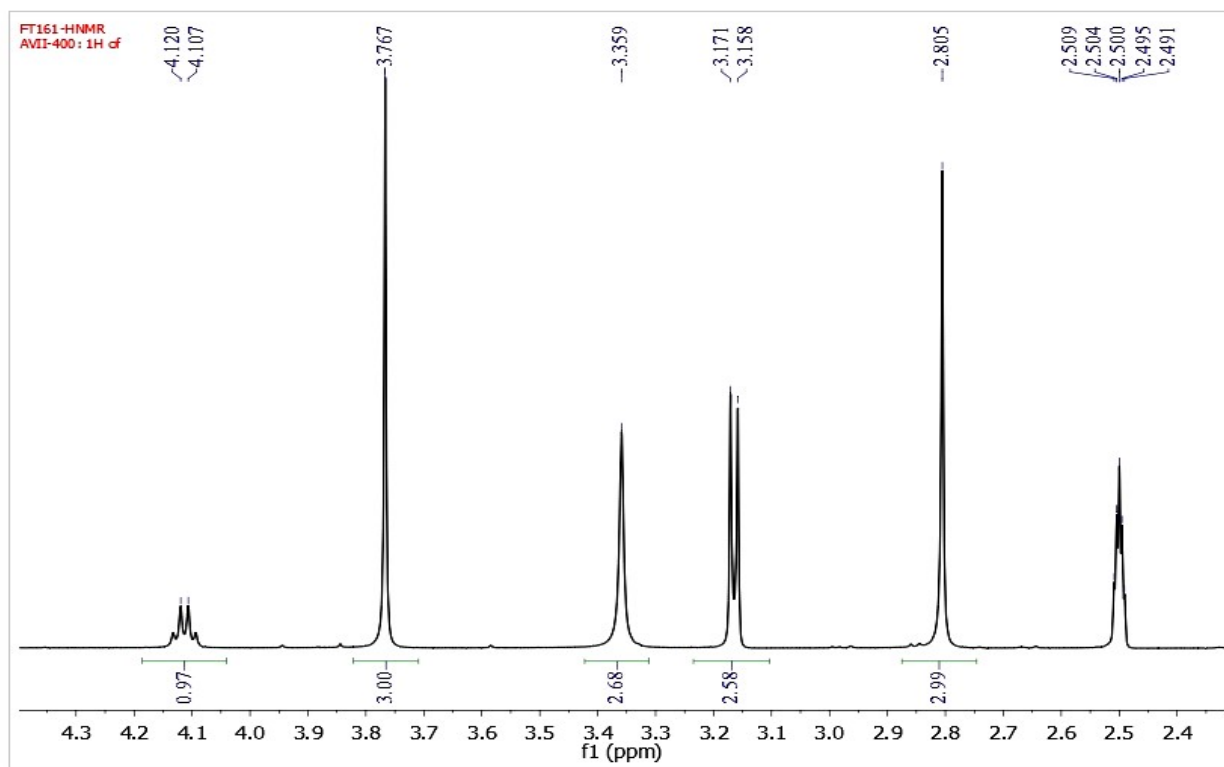

**Fig. S15.** Expanded  $^1\text{H}$  NMR spectrum of complex **2** in  $\text{DMSO-d}_6$  (top 6.5-7.5 ppm; bottom 2.3-4.3 ppm)

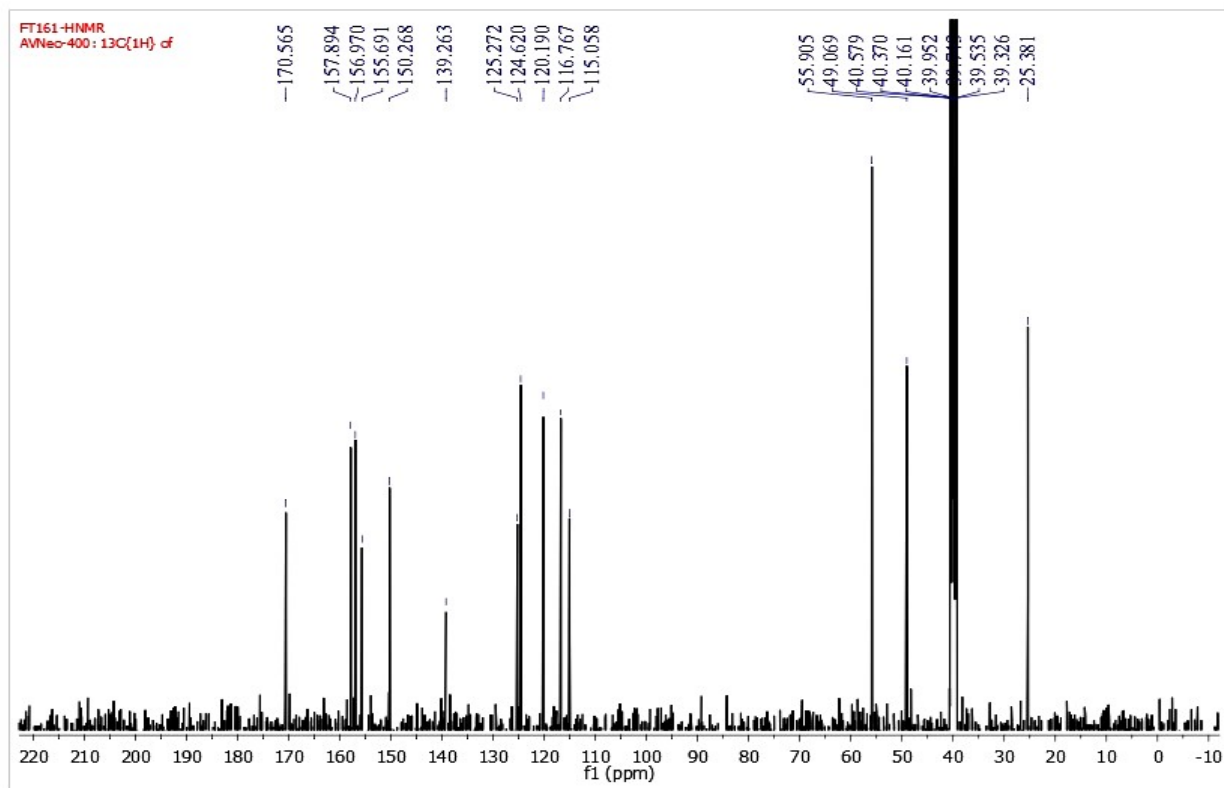

Fig. S16.  $^{13}\text{C}$  NMR spectrum of complex **2** in  $\text{DMSO-d}_6$

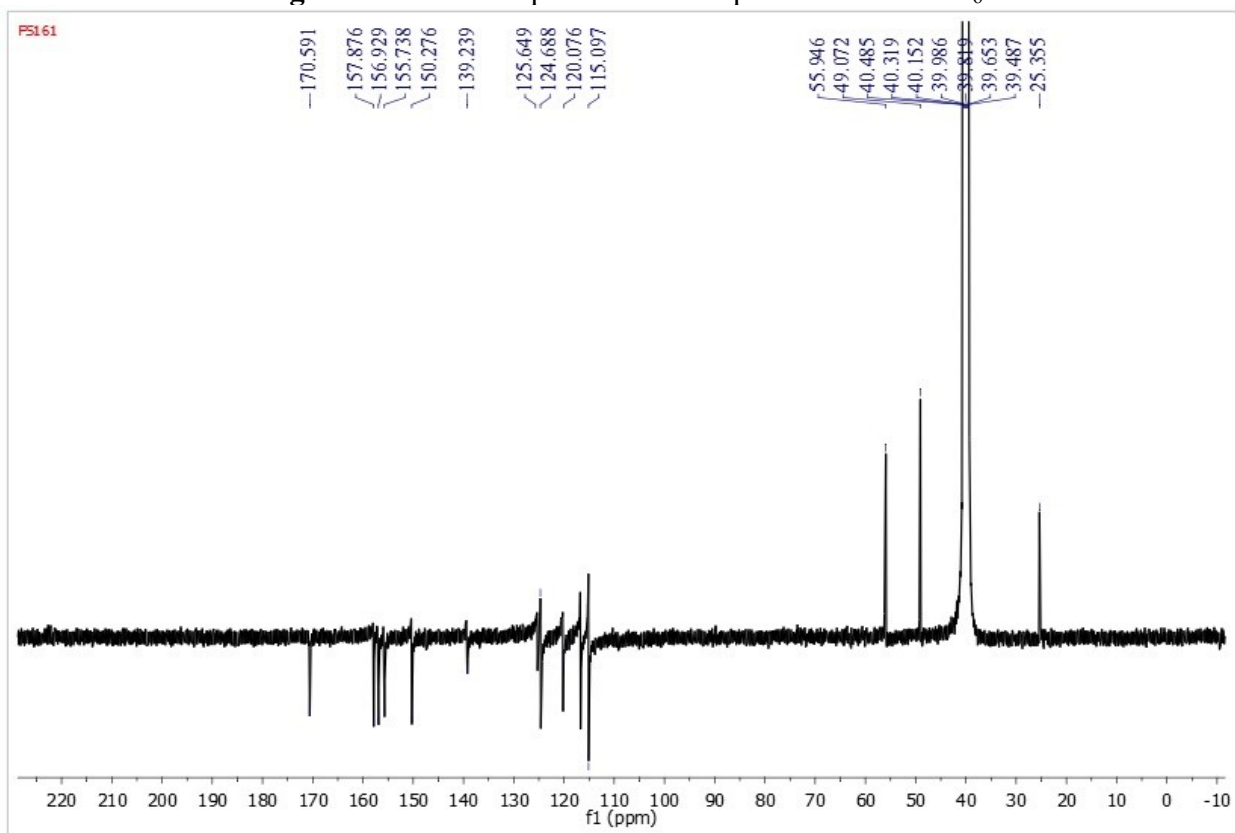

Fig. S17. DEPT  $^{13}\text{C}$  NMR spectrum of complex **2** in  $\text{DMSO-d}_6$

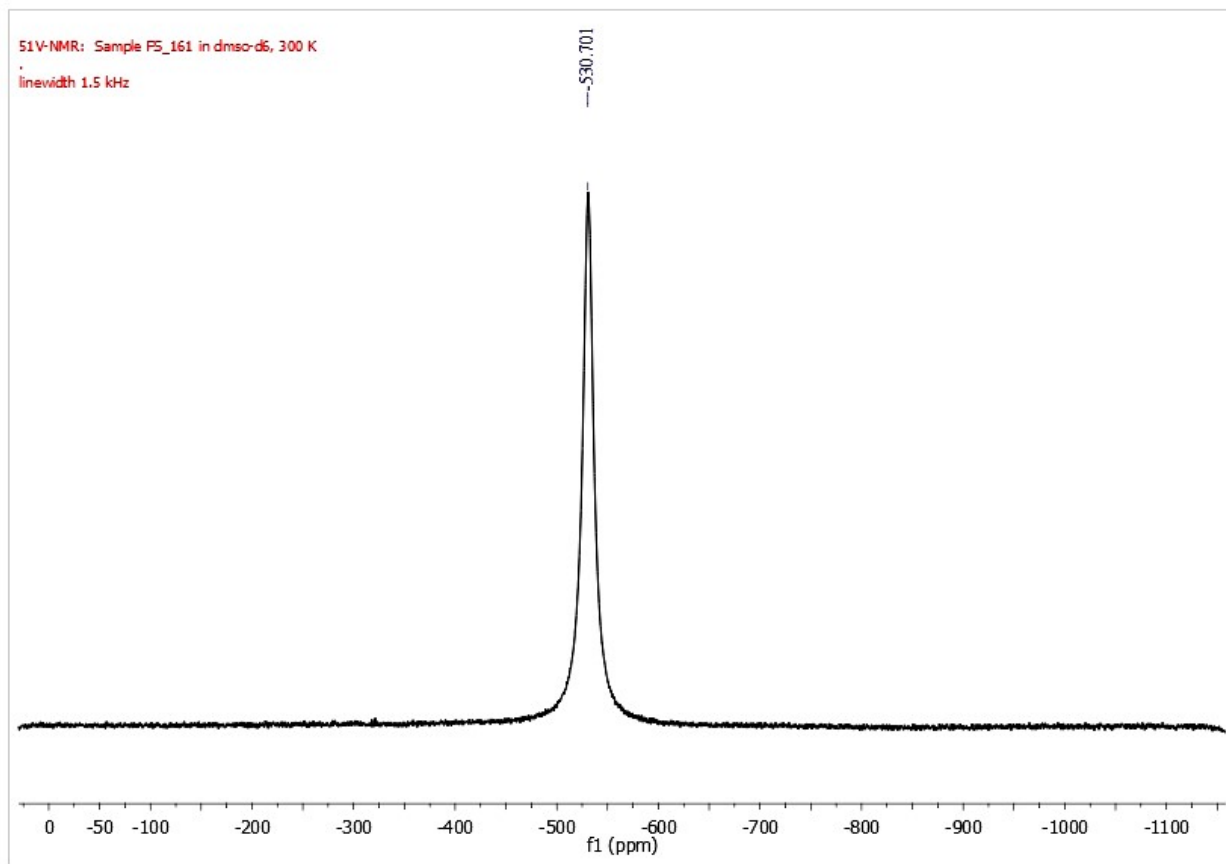

**Fig. S18.**  $^{51}\text{V}$  NMR spectrum of complex **2** in  $\text{DMSO-d}_6$



Line#:1 R.Time:----(Scan#----)  
MassPeaks:167  
RawMode:Averaged 0.333-0.640(201-385) BasePeak:159.15(328188)  
BG Mode:Averaged 0.700-0.973(421-585) Segment 1 - Event 1

FS31

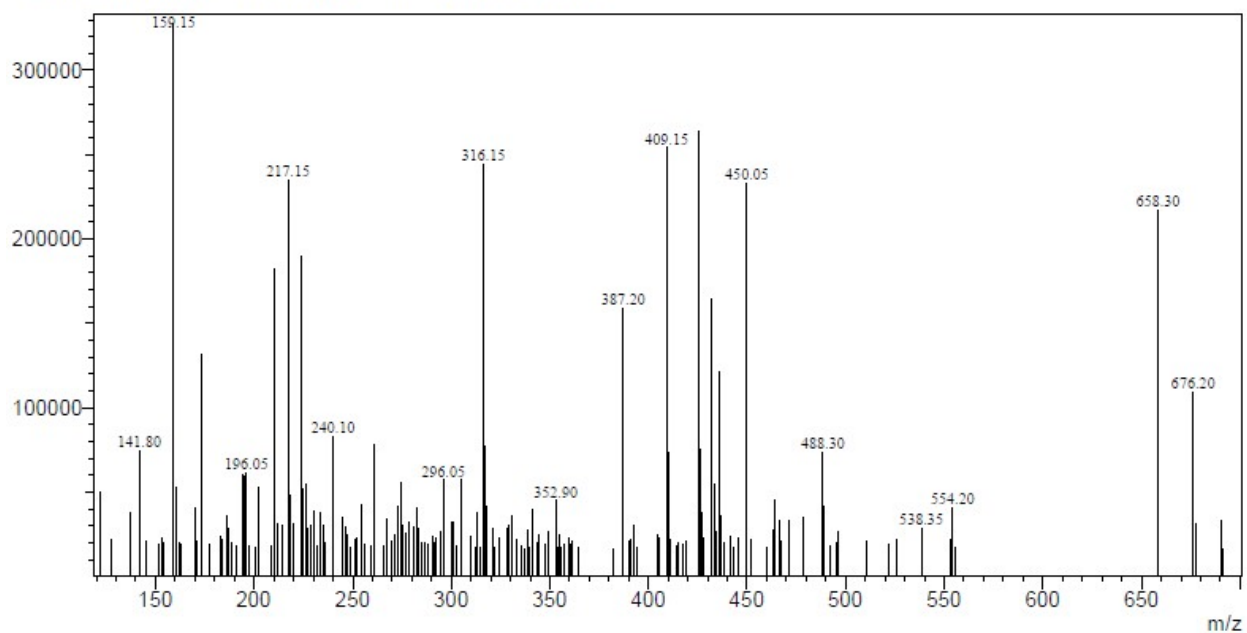

Fig. S19. Mass spectrum of complex 1

Line#:1 R.Time:0.580(Scan#:349)  
MassPeaks:22  
RawMode:Single 0.580(349) BasePeak:453.10(20000000)  
BG Mode:None Segment 1 - Event 1

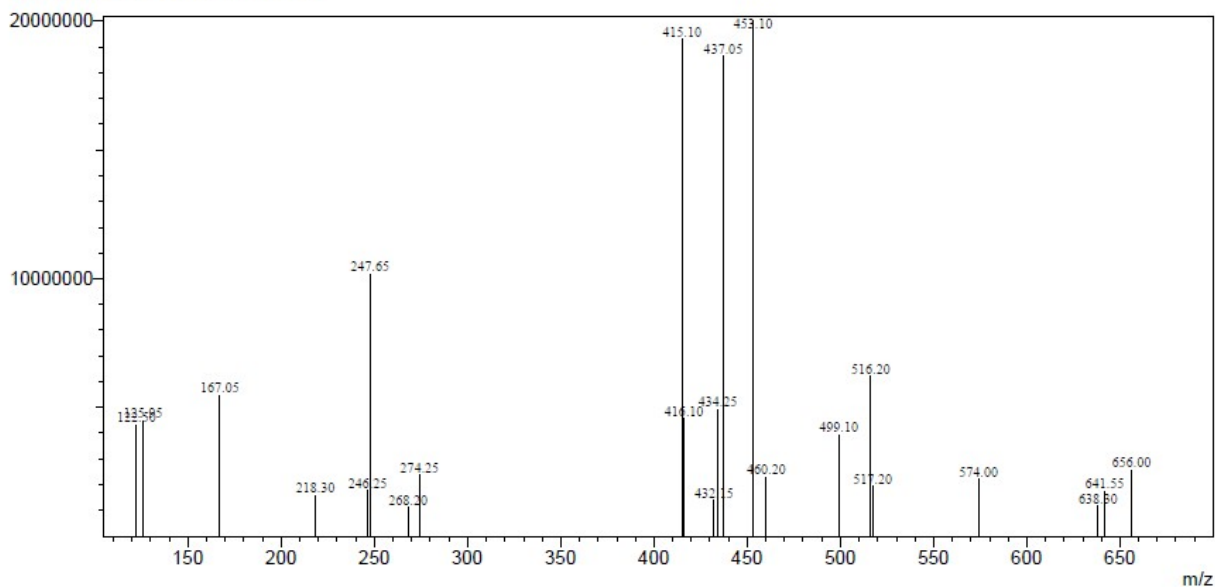

Fig. S20. Mass spectrum of complex 2

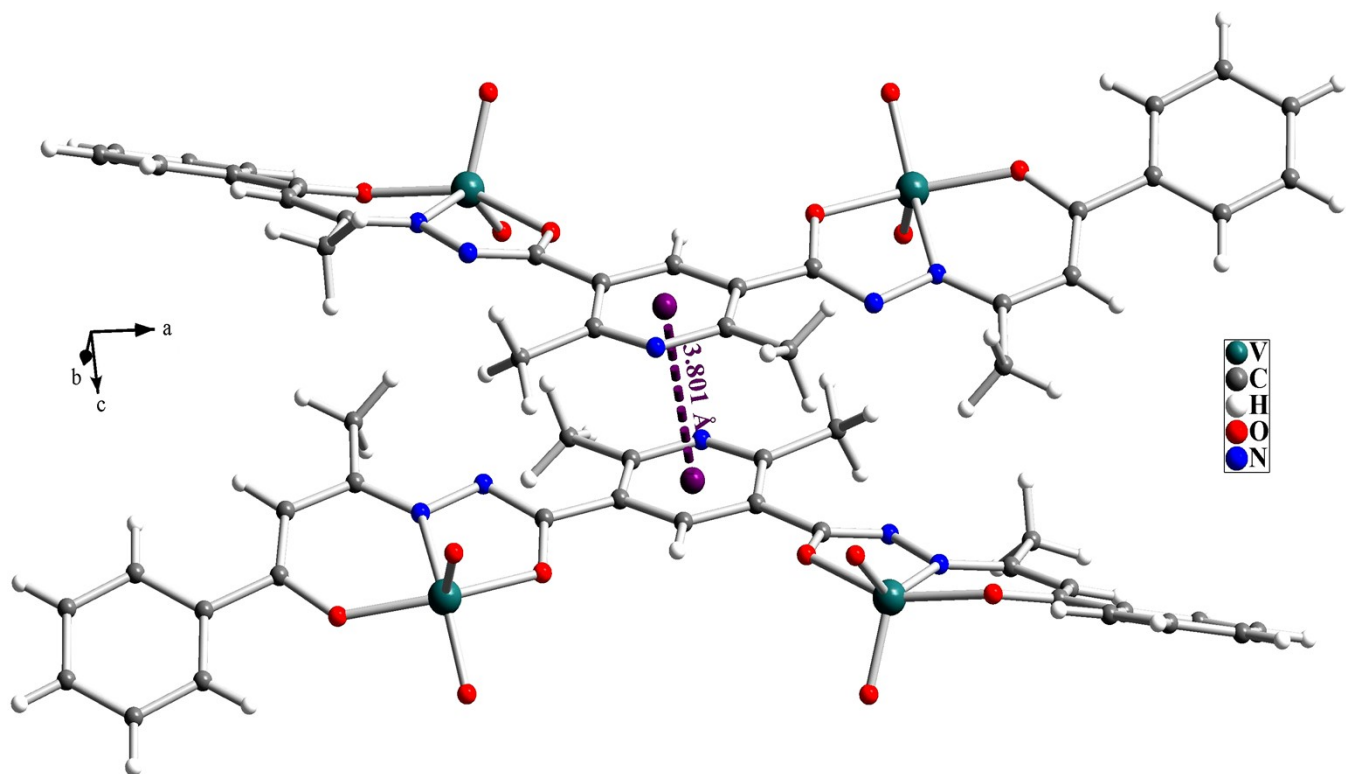

**Fig. S21.** Intermolecular  $\pi \cdots \pi$  stacking interaction in the crystal structure of complex 1

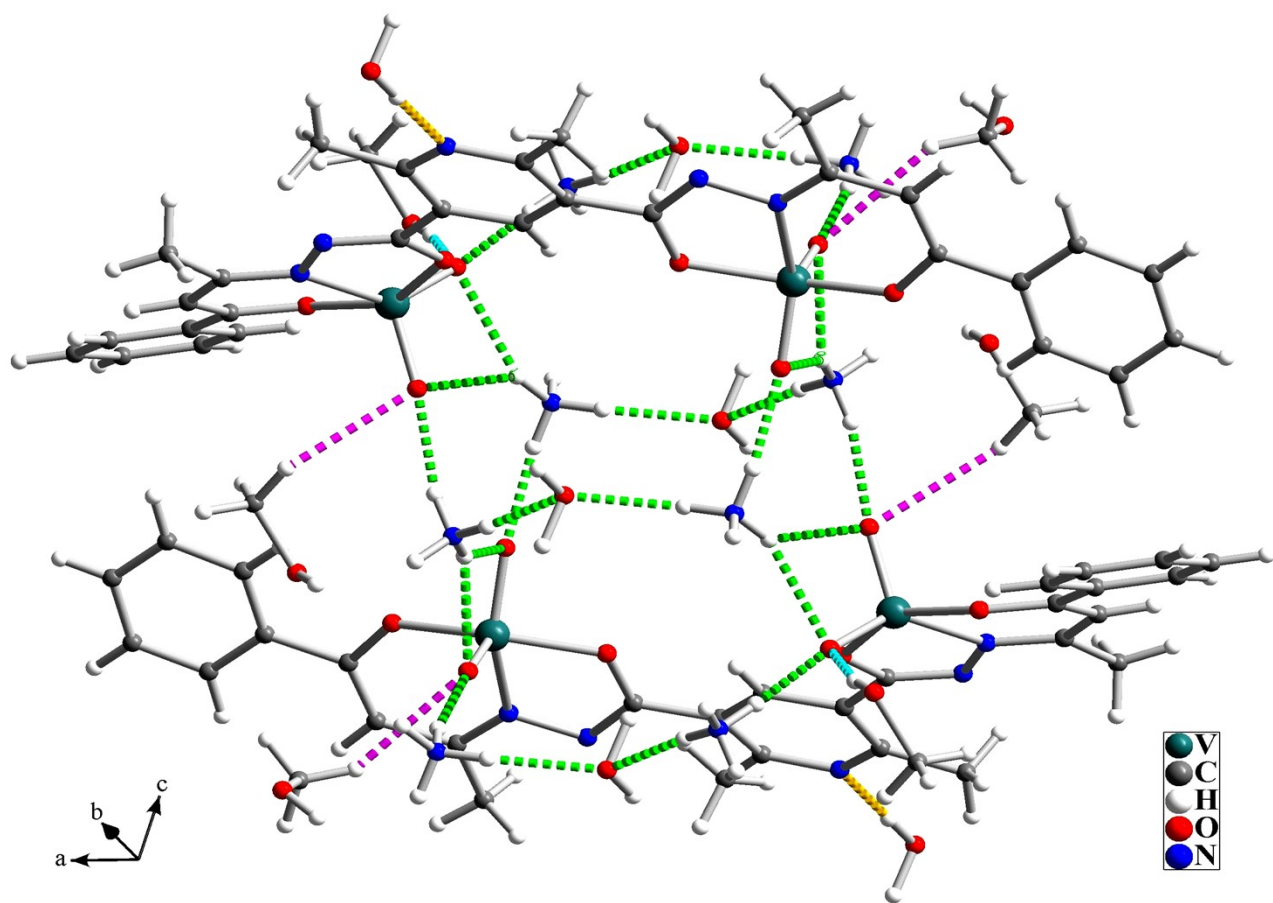

**Fig. S22.** Hydrogen bond interactions in the crystal structure of complex **1**; O–H...N (orange), O–H...O (blue), N–H...O (green) and C–H...O (pink)

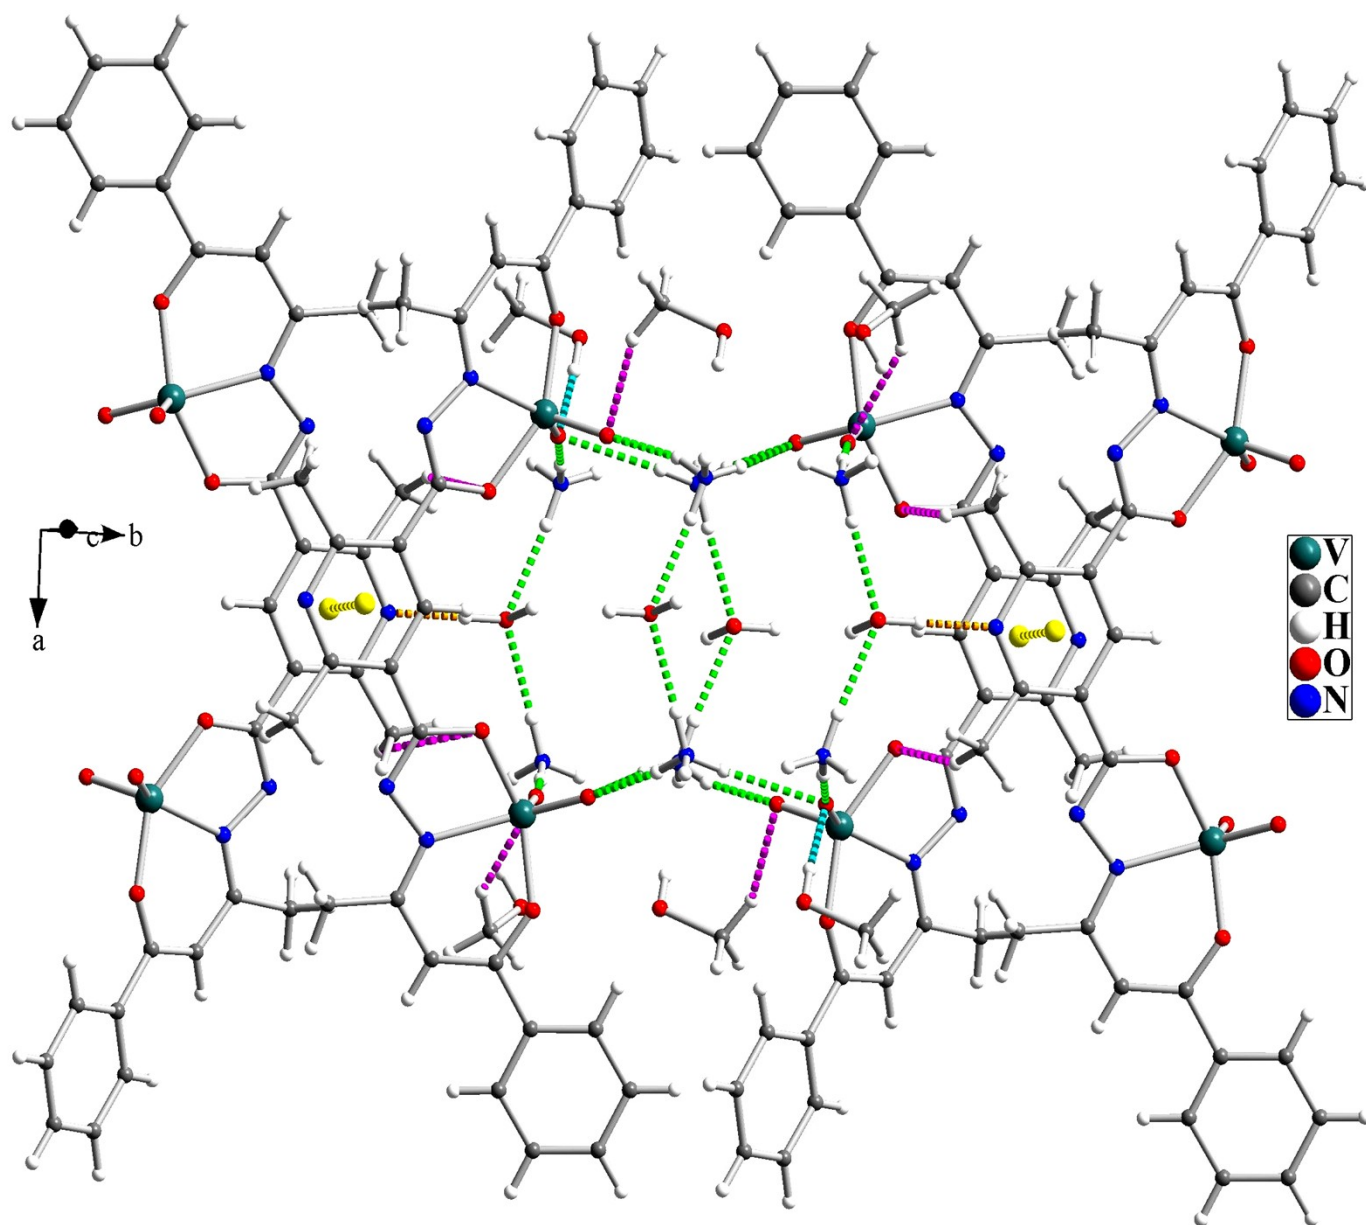

**Fig. S23.** Intermolecular  $\pi \cdots \pi$  stacking (yellow dashed line) and  $\text{O-H} \cdots \text{N}$  (orange),  $\text{O-H} \cdots \text{O}$  (blue),  $\text{N-H} \cdots \text{O}$  (green) and  $\text{C-H} \cdots \text{O}$  (pink) hydrogen bond interactions in the crystal structure of complex 1

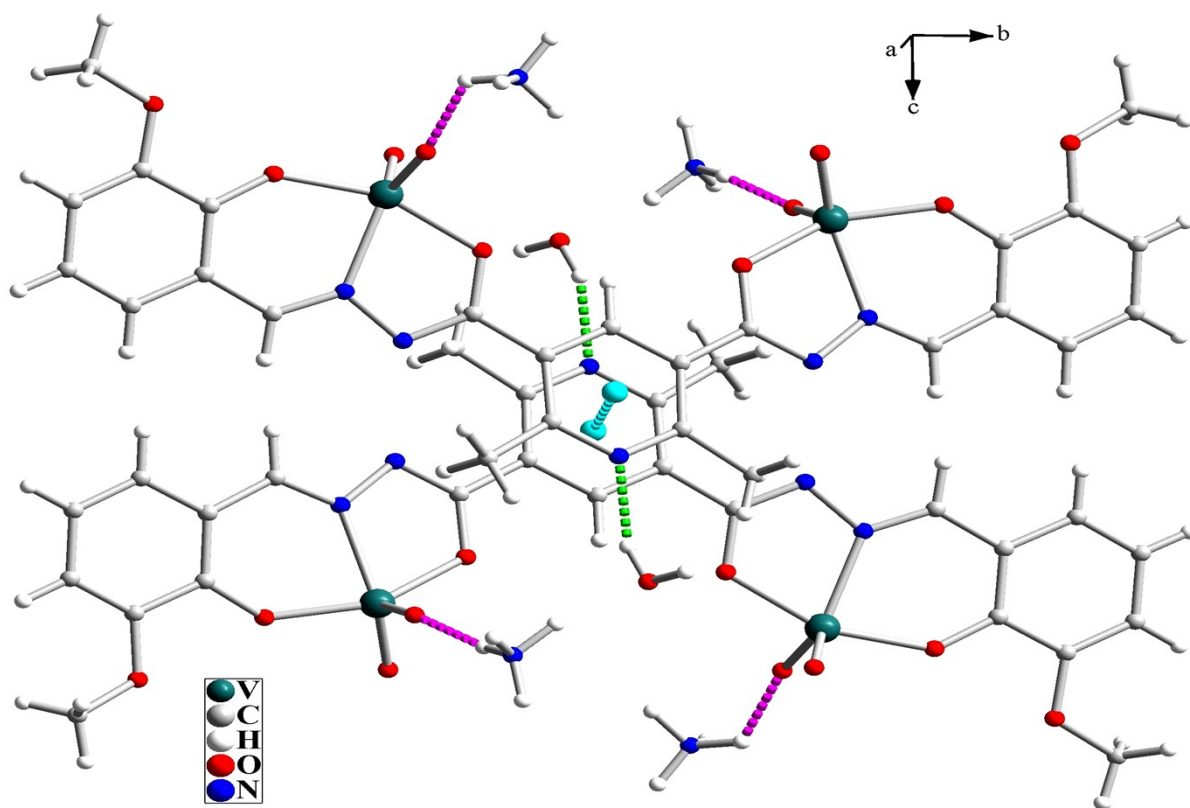

**Fig. S24.** Intermolecular  $\pi\cdots\pi$  stacking (blue dashed line) and hydrogen bond interactions O–H $\cdots$ N (green) and N–H $\cdots$ O (pink) in the crystal structure of complex **2**

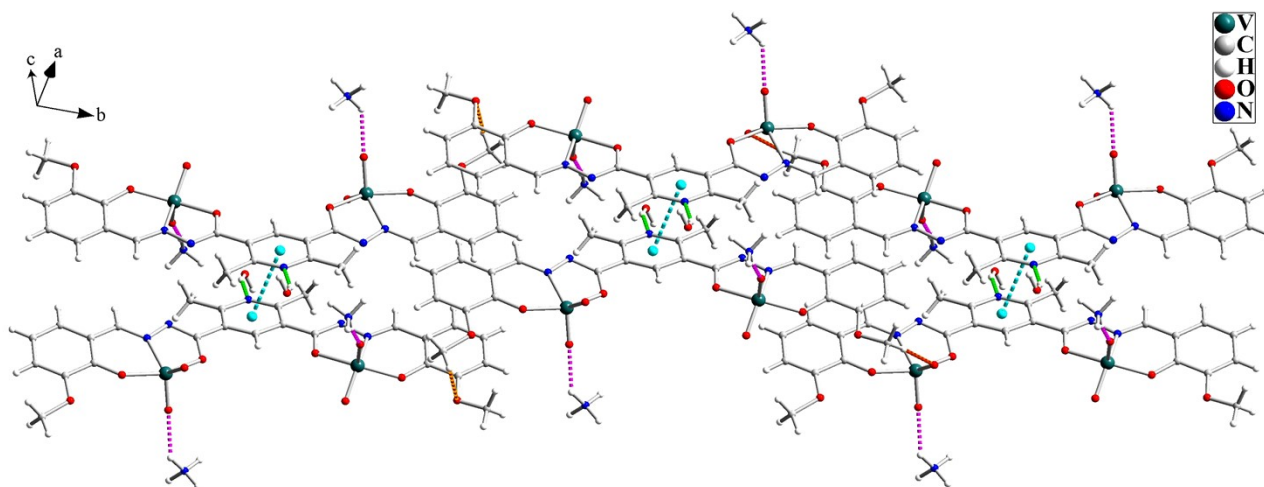

**Fig. S25.** Intermolecular  $\pi\cdots\pi$  stacking (blue dashed line) and O–H $\cdots$ N (green), N–H $\cdots$ O (pink) and C–H $\cdots$ O (orange) hydrogen bond interactions in the crystal structure of complex **2**

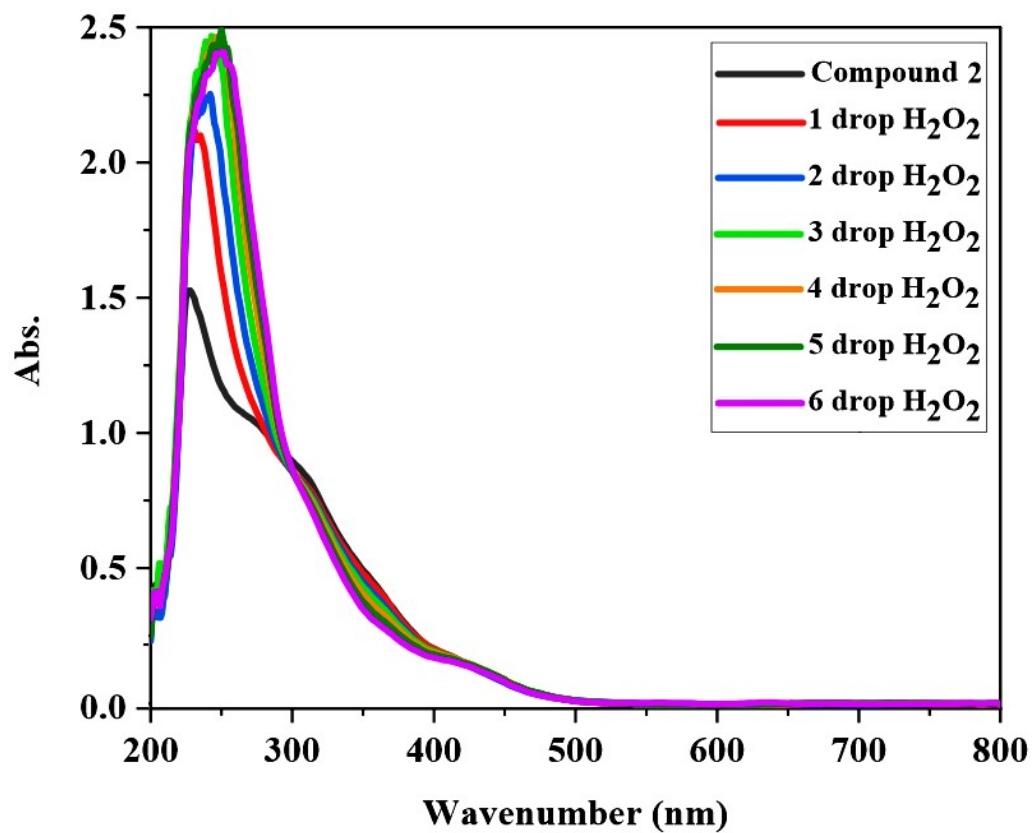

Fig. S26. UV-Vis spectra of complex 2 after addition of diluted H<sub>2</sub>O<sub>2</sub> in CH<sub>3</sub>OH
